# Supplementary material
Source: PubMed Central journal article supplement (PMC3694706)
Supplement: supp_tpc.113.111047_tpc111047-SupplementalDataRev.pdf [file supp_tpc.113.111047_tpc111047-SupplementalDataRev.pdf]

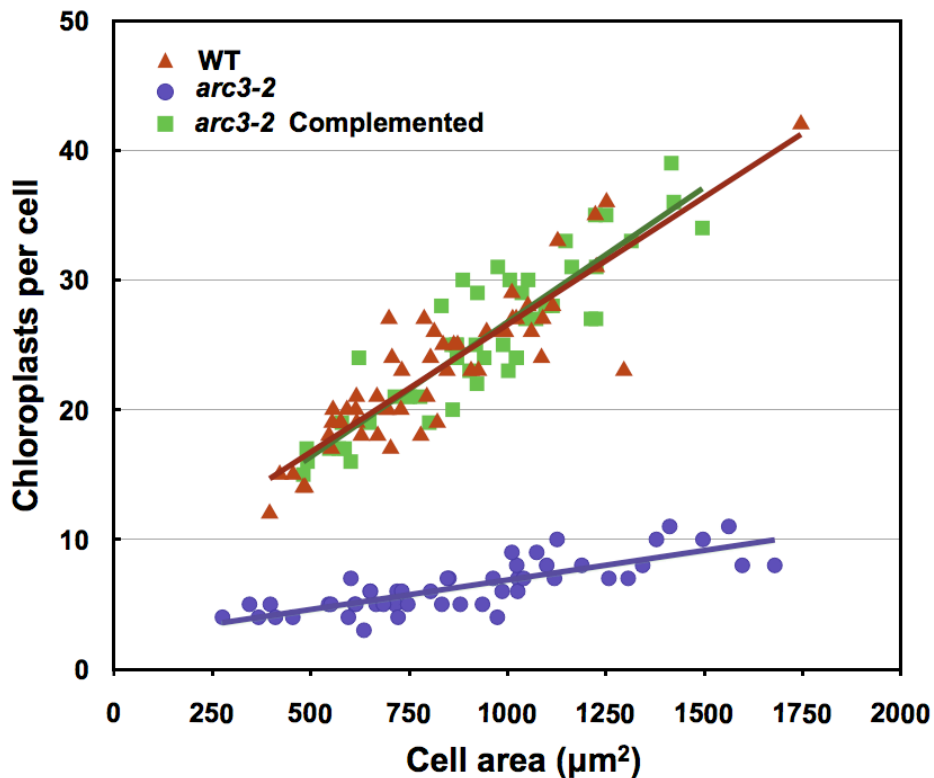

**Supplemental Figure 1. Quantitative Analysis of Chloroplast Number vs. Mesophyll Cell Size in Young Expanding Leaves.**

Cells from 2.5-week old seedlings of WT (Col-0), *arc3-2* and T<sub>1</sub> *arc3-2* transgenics complemented with *PARC3-ARC3-Myc* were quantified (n ≥ 50 cells). R<sup>2</sup> values for best-fit lines are 0.80, 0.64 and 0.81 for plants of WT, *arc3-2* and *arc3-2* complemented with *PARC3-ARC3-Myc*, respectively.

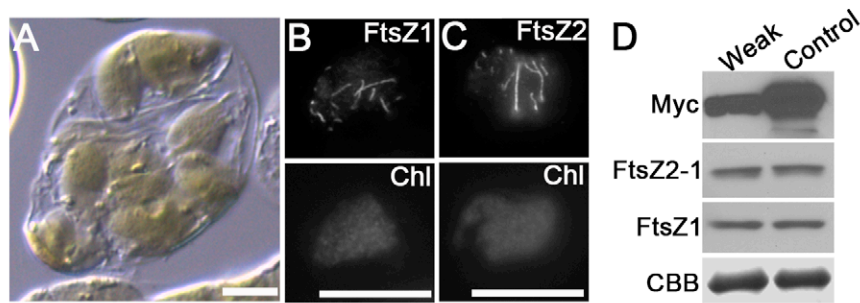

**Supplemental Figure 2. Chloroplast Phenotype and FtsZ Morphology in WT Plants with Lower Accumulation of ARC3-Myc.**

(A) to (C) Brightfield (A) and epifluorescence ([B] and [C]) micrographs showing the mild chloroplast division defect (A) and FtsZ1 and FtsZ2 filaments within chloroplasts ([B] and [C]) in a mesophyll cell of a WT plant transformed with *P35S-ARC3-Myc* and expressing the fusion protein at lower levels than in Figure 1D. Anti-FtsZ1- and anti-FtsZ2-1-specific antibodies were used for immunolabeling FtsZ1 and FtsZ2, respectively. Chl, chlorophyll autofluorescence. Scale bars, 10  $\mu$ m.

(D) Immunoblot showing ARC3-Myc levels in the transgenic plant shown in ([A] to [C]). Total protein from 2 mg of fresh leaf tissue was loaded in each lane. ARC3-Myc, FtsZ1 and FtsZ2 were detected with anti-Myc, anti-FtsZ1, and anti-FtsZ2-1, respectively. Control shows the signal from the same extract as shown in Figure 1E, lane 6. CBB, Coomassie staining of Rubisco in the gel as a loading control.

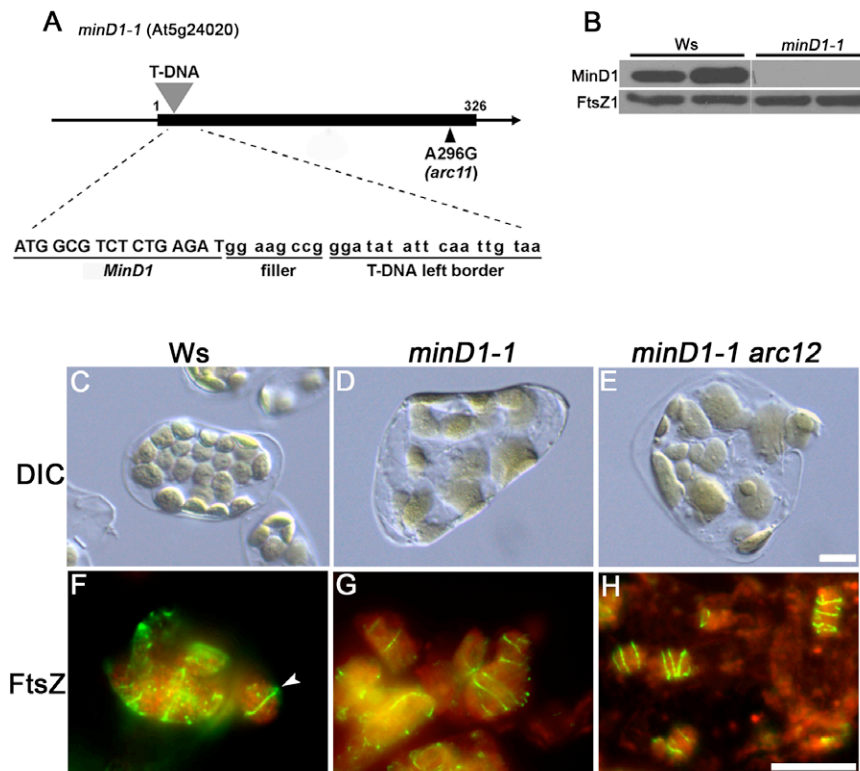

### Supplemental Figure 3. Chloroplast Phenotypes and FtsZ Morphology in the *minD1-1* Single Mutant and the *minD1-1 arc12* Double Mutant.

**(A)** Structure of the *minD1-1* allele (Ws background). The T-DNA insertion (gray triangle) interrupts the *Arabidopsis MinD1* open reading frame, which encodes a 326-amino acid protein, 16-bp downstream of the translational initiation site, within the region encoding the predicted transit peptide. The sequence at the junction with nucleotides from *MinD1* (capital letters), an 8-bp linker of unknown origin (filler), and the T-DNA left border are shown. The structure of the allele indicates it is null for *MinD1*. Black triangle shows the positions of the point mutation in the *arc11* allele (Fujiwara et al., 2004).

**(B)** Immunoblot analysis showing *minD1-1* is a knockout mutant of *Arabidopsis MinD1*. FtsZ1 is shown as a loading control.

**(C) to (H)** Chloroplast phenotype (DIC) and FtsZ morphology in single mesophyll cells of *minD1-1* and *minD1-1 arc12*. **(F) to (H)** shows merged images of fluorescence signals from immunolabeling of FtsZ (green) and chlorophyll autofluorescence (red). White arrowhead indicates FtsZ ring in WT plants in **(F)**. Scale bars, 10  $\mu$ m.

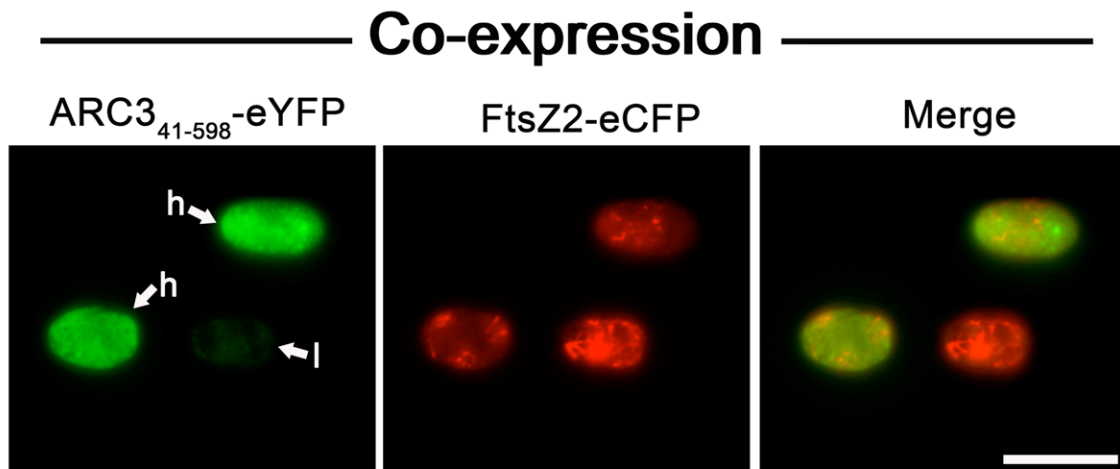

**Supplemental Figure 4. FtsZ2-eCFP Morphology in Additional *S. pombe* Cells with Higher Accumulation of ARC3<sub>41-598</sub>-eYFP.**

Images were processed and labeled as described in Figure 7. Scale bar, 10  $\mu$ m.

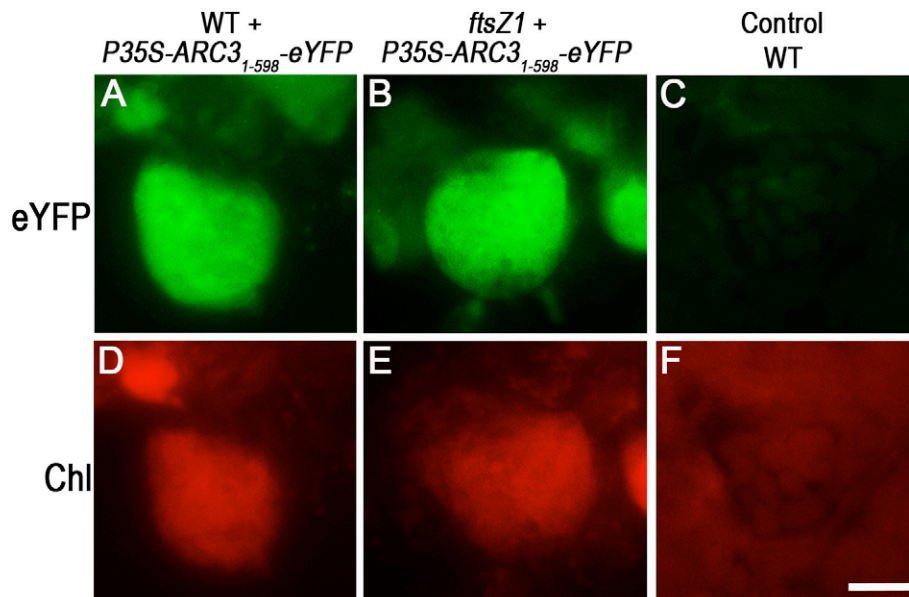

**Supplemental Figure 5. Localization of ARC3<sub>1-598</sub>-eYFP in WT and *ftsZ1* Plants.**

(A) to (B) Localization of ARC3<sub>1-598</sub>-eYFP in chloroplasts of mesophyll cells of WT (Col-0) plants (A) and *ftsZ1* plants expressing *P35S-ARC3<sub>1-598</sub>-eYFP* (B). The ARC3<sub>1-598</sub>-eYFP signal was predominantly detected in the stroma. (C) Control showing lack of eYFP signal in chloroplasts of WT. Images were obtained using a 0.1 s exposure.

(D) to (F) Autofluorescence of chlorophyll showing chloroplast morphologies in mesophyll cells of the indicated plants. Images were obtained using a 0.01 s exposure.

Chl, chlorophyll autofluorescence. Scale bars, 10  $\mu$ m.

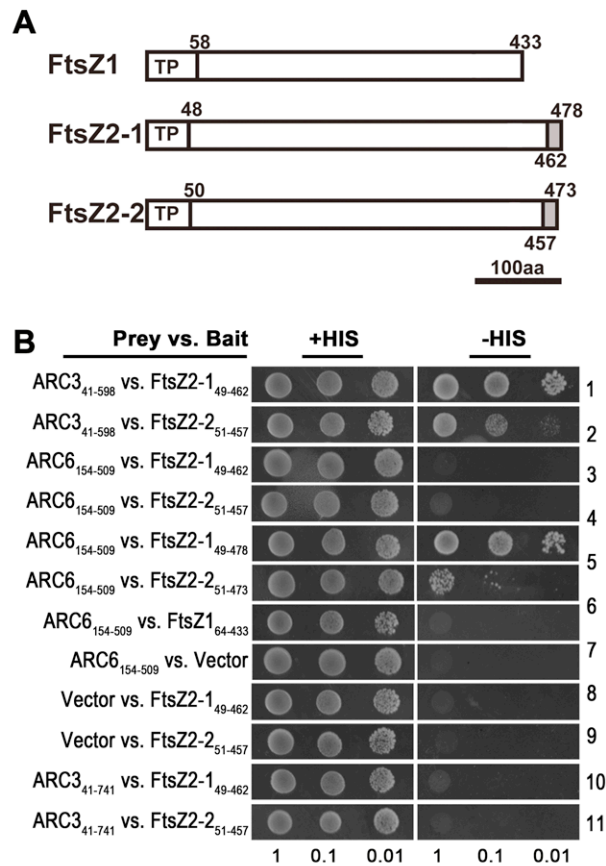

**Supplemental Figure 6. Yeast Two-hybrid Assays between ARC3 and Truncated Variants of FtsZ2-1 and FtsZ2-2.**

(A) Schematic diagram emphasizing the absence in FtsZ1 and presence in FtsZ2-1 and FtsZ2-2 of the conserved C-terminal peptide (gray).

(B) Yeast two-hybrid assays showing that ARC3<sub>41-598</sub> interacts with both FtsZ2-1 and FtsZ2-2 lacking their C-terminal peptides. Interactions between the stromal region of ARC6 (residues 154-590) and FtsZ2-1 and FtsZ2-2 with and without their C-terminal peptides, served as controls. All ARC6 and FtsZ2 vectors and interactions were reported previously (Schmitz et al., 2009).

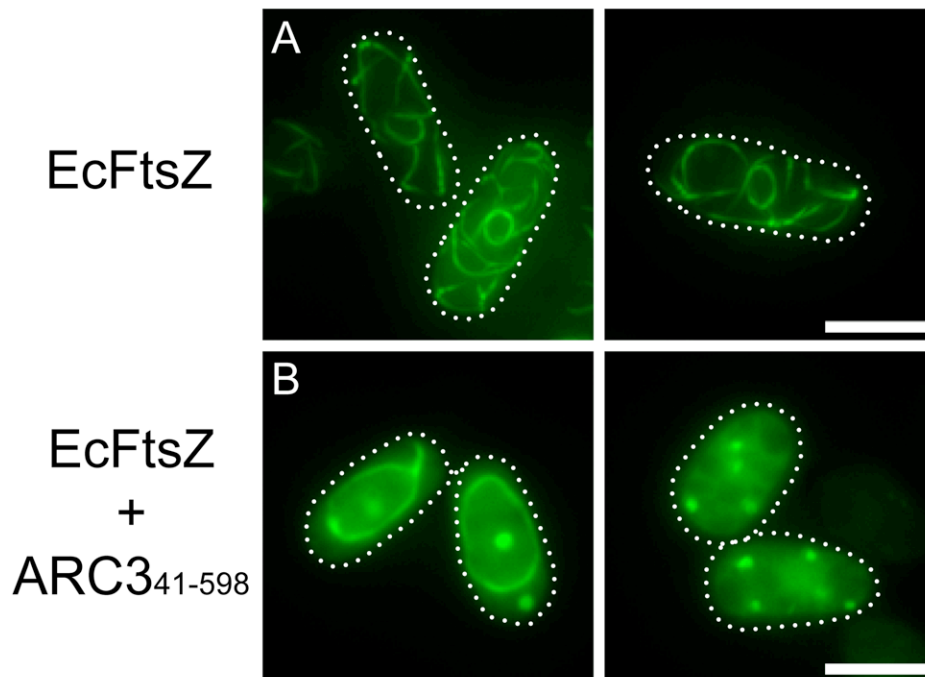

**Supplemental Figure 7. Effect of ARC3<sub>41-598</sub> on *E. coli* FtsZ Assembly in *S. pombe*.**

**(A)** Epifluorescence micrographs showing the morphology of *E. coli* FtsZ tagged with GFP (EcFtsZ) in *S. pombe* cells. *pREP42-FtsZ-GFP* (Srinivasan et al., 2007) was transformed into *S. pombe* strain MBY192.

**(B)** Morphology of EcFtsZ coexpressed with *Arabidopsis* ARC3<sub>41-598</sub> in *S. pombe*. Cells were transformed with both *pREP42-FtsZ-GFP* and *pREP41X-ARC3<sub>41-598</sub>-eYFP*; the promoters in the two vectors are the same.

Images show the GFP signal from EcFtsZ-GFP falsely colored green. Scale bars, 5 $\mu$ m. Samples were imaged by differential interference contrast (not shown) and epifluorescence microscopy using a microscope (model DMRA2; Leica) with an HCX PL Apochromat 63x (1.32 NA) oil-immersion objective (Leica) and a camera (Retiga Exi; QImaging) at room temperature. Z stacks were taken using 0.5- $\mu$ m increments, and the images were de-blurred by performing nearest neighbor deconvolution with 70% haze removal using Image-Pro 7.0 software (Media Cybernetics). White dots show cell outlines.

**Supplemental Table 1. Primers Used in This Paper Shown 5' to 3'.**

| <b>Name</b> | <b>Sequence</b>                                                    | <b>Enzymes</b> |
|-------------|--------------------------------------------------------------------|----------------|
| LBb1.3      | ATTTTGCCGATTCGGAAC                                                 | N/A            |
| ARC3LP      | AAGAAATCTATCCGCTCGAGC                                              | N/A            |
| ARC3RP      | TGACCTTGTTCCATCCAAATC                                              | N/A            |
| Z1LP        | CAGAGCTTGCGAATCCGTGTT                                              | N/A            |
| Z1RP        | AAGCATGCGCAAAGTCAGTCG                                              | N/A            |
| Z2-2LP      | ACCTACAAATCGTTTTCCCGAG                                             | N/A            |
| Z2-2RP      | TGGTGCTCCTATAATTGCAGG                                              | N/A            |
| Z2-1LP      | TTTTCATGTAATGCTGCAAACCTC                                           | N/A            |
| Z2-1RP      | ACCCCTAGTCAACTCCTTACCAAT                                           | N/A            |
| G-DNA       | ATATTGACCATCATACTCATTGC                                            | N/A            |
| KOY07       | CATTTTATSSTSSCGCTGCGGACATC                                         | N/A            |
| KOY10       | ATAAACCGTAAACCCTGTGAAGCC                                           | N/A            |
| KOY11       | CACGTTTCTTAGGTTCTTCCA                                              | N/A            |
| A12F        | CAACATGGGTTTCTTTGACAGGTTAAACTTA                                    | N/A            |
| A12R        | TGTTGTTGACGATTTTCTTTTAGCTT                                         | N/A            |
| MZ3         | GCTCTAGAATGCCGATTTCTATGGAACCTC                                     | XbaI           |
| MZ4         | GGACTAGTCGCTTTCCGGCCTTCAAAG                                        | SpeI           |
| MZ5         | CGTCTAGAAGAGGTAGTTTTTTGTTGCT                                       | XbaI           |
| MZ6         | GGACTAGTATCTGTACATAAGAGAGTTGAAGGATT                                | SpeI           |
| MZ7         | ACAGATTCTAGAAAGTTACAAAGAGGCA                                       | XbaI           |
| MZ19        | CGAGCTCTCACAGATCCTCTTCTGAGATGAGTTTTTTGTTTCATC<br>TCCGGCGTCCACTTGTT | SacI           |
| MZ1         | CCAAGCTTTCAGTGGAAGATTCAACAAGCG                                     | HindIII        |
| MZ2         | GCTCTAGACGGCATTGCTCCGCTTC                                          | XbaI           |
| MZ9         | CATCTTCTTACTAGTGGGCTGCTTTTTTC                                      | SpeI           |
| MZ22        | CGGTCGACAAGAATAGGACTCCATCTTTTTGAT                                  | Sall           |
| MZ109       | GCTCTAGAATGGCGTCTCTGAGATTGTTT                                      | XbaI           |
| MZ110       | CGAGCTCCACATAATCATTTCTATTTCCGGG                                    | SacI           |
| MZ38        | CGGGATCCATGTGTACATCTCGAAAGGCGCGT                                   | BamHI          |
| MZ169       | CGCCCTTGCTCACCATAAGAATAGGACTCCATCTTTTTGAT                          | N/A            |
| MZ170       | ATCAAAAAGATGGAGTCCTATTCTTATGGTGAGCAAGGGCG                          | N/A            |
| MZ171       | TCCCCCGGGTTACTTGTACAGCTCGTCCATG                                    | XmaI           |



## Supplemental References

- Fujiwara, M.T., Nakamura, A., Itoh, R., Shimada, Y., Yoshida, S., and Møller, S.G.** (2004). Chloroplast division site placement requires dimerization of the ARC11/AtMinD1 protein in *Arabidopsis*. *J Cell Sci* **117**, 2399-2410.
- Schmitz, A.J., Glynn, J.M., Olson, B.J.S.C., Stokes, K.D., and Osteryoung, K.W.** (2009). *Arabidopsis* FtsZ2-1 and FtsZ2-2 are functionally redundant, but FtsZ-based plastid division is not essential for chloroplast partitioning or plant growth and development. *Mol Plant* **2**, 1211-1222.
- Srinivasan, R., Mishra, M., Murata-Hori, M., and Balasubramanian, M.K.** (2007). Filament formation of the *Escherichia coli* actin-related protein, MreB, in fission yeast. *Curr Biol* **17**, 266-272.
